# Supplementary material
Source: PubMed Central journal article supplement (PMC5947997)
Supplement: NIHMS964250-supplement-1.pdf [file NIHMS964250-supplement-1.pdf]

Table S1. Groups of causes used in the Multiple Correspondence Analysis an number of deaths at ages 50-89 with obesity as UC or CC that have a mention of these groups - France, Italy, United States, 2010-2011

| #                                                                   | ICD-10 codes                                                                                                       | Deaths at ages 50-89 with obesity as UC or CC that have a mention of the group                                 |            |           |            |
|---------------------------------------------------------------------|--------------------------------------------------------------------------------------------------------------------|----------------------------------------------------------------------------------------------------------------|------------|-----------|------------|
|                                                                     |                                                                                                                    | France %                                                                                                       | Italy %    | U.S. %    |            |
| <b>Infectious and parasitic diseases</b>                            |                                                                                                                    |                                                                                                                |            |           |            |
| 1                                                                   | Tuberculosis                                                                                                       | A15-A19, B90                                                                                                   | 26 0%      | 8 0%      | 5 0%       |
| 2                                                                   | AIDS (HIV-disease)                                                                                                 | B20-B24                                                                                                        | 3 0%       | 1 0%      | 40 0%      |
| 3                                                                   | Viral hepatitis                                                                                                    | B15-B19, B94.2                                                                                                 | 37 0%      | 81 1%     | 322 1%     |
| 4                                                                   | Septicaemia                                                                                                        | A40-A41                                                                                                        | 1074 10%   | 841 9%    | 3107 7%    |
| 5                                                                   | Intestinal infectious diseases                                                                                     | A00-A09                                                                                                        | 72 1%      | 13 0%     | 231 1%     |
| 6                                                                   | Other infectious and parasitic diseases                                                                            | (A00-B99), U01-U4, U80-U89 except Supra 'A' and 'B'                                                            | 365 4%     | 62 1%     | 438 1%     |
| <b>Neoplasms</b>                                                    |                                                                                                                    |                                                                                                                |            |           |            |
| 7                                                                   | Malignant neoplasm of lip, oral cavity, pharynx                                                                    | C00-C14                                                                                                        | 10 0%      | 6 0%      | 25 0%      |
| 8                                                                   | Malignant neoplasm of oesophagus                                                                                   | C15                                                                                                            | 17 0%      | 3 0%      | 36 0%      |
| 9                                                                   | Malignant neoplasm of stomach                                                                                      | C16                                                                                                            | 18 0%      | 31 0%     | 30 0%      |
| 10                                                                  | Malignant neoplasm of small intestine, colon, rectum and anus, and other/ill-defined digestive organs              | C17,C18,C19, C20, C21,C26                                                                                      | 170 2%     | 106 1%    | 309 1%     |
| 11                                                                  | Malignant neoplasm of liver, the intrahepatic bile ducts, gallbladder and other unspecified parts of biliary tract | C22, C23 ,C24                                                                                                  | 106 1%     | 67 1%     | 124 0%     |
| 12                                                                  | Malignant neoplasm of pancreas                                                                                     | C25                                                                                                            | 45 0%      | 40 0%     | 119 0%     |
| 13                                                                  | Malignant neoplasm of larynx and trachea/bronchus/lung                                                             | C32-C34                                                                                                        | 176 2%     | 146 2%    | 417 1%     |
| 14                                                                  | Malignant melanoma of skin                                                                                         | C43                                                                                                            | 16 0%      | 13 0%     | 39 0%      |
| 15                                                                  | Malignant neoplasm of skin                                                                                         | C44                                                                                                            | 6 0%       | 4 0%      | 23 0%      |
| 16                                                                  | Malignant neoplasm of breast                                                                                       | C50                                                                                                            | 157 2%     | 124 1%    | 320 1%     |
| 17                                                                  | Malignant neoplasm of cervix uteri and other parts of uterus                                                       | C53-C55                                                                                                        | 76 1%      | 61 1%     | 223 1%     |
| 18                                                                  | Malignant neoplasm of ovary                                                                                        | C56                                                                                                            | 32 0%      | 12 0%     | 79 0%      |
| 19                                                                  | Malignant neoplasm of prostate                                                                                     | C61                                                                                                            | 93 1%      | 39 0%     | 200 0%     |
| 20                                                                  | Malignant neoplasm of kidney                                                                                       | C64                                                                                                            | 34 0%      | 22 0%     | 133 0%     |
| 21                                                                  | Malignant neoplasm of bladder                                                                                      | C67                                                                                                            | 35 0%      | 20 0%     | 84 0%      |
| 22                                                                  | Malignant neoplasm of lymph./haematopoietic tissue                                                                 | C81-C96                                                                                                        | 133 1%     | 104 1%    | 275 1%     |
| 23                                                                  | Malignant neoplasm of eye, brain and other parts of central nervous system                                         | C69-C72                                                                                                        | 22 0%      | 16 0%     | 47 0%      |
| 24                                                                  | Secondary malignant neoplasm                                                                                       | C77-C79                                                                                                        | 375 4%     | 225 3%    | 271 1%     |
| 25                                                                  | Malignant neoplasm of ill-defined/unspecified/ independent (primary) multiple sites                                | C76, C80, C97                                                                                                  | 162 2%     | 169 2%    | 304 1%     |
| 26                                                                  | Other malignant neoplasms                                                                                          | (C00-C99) except Supra 'C' codes                                                                               | 49 0%      | 49 1%     | 107 0%     |
| 27                                                                  | Benign neoplasms, In situ neoplasms and neoplasms of uncertain or unknown behaviour                                | D00 - D48                                                                                                      | 149 1%     | 177 2%    | 195 0%     |
| 28                                                                  | <b>Diseases of the blood(-forming organs), immunological disorders</b>                                             | D50-D89                                                                                                        | 207 2%     | 327 4%    | 1229 3%    |
| <b>Endocrine, nutritional and metabolic diseases</b>                |                                                                                                                    |                                                                                                                |            |           |            |
| 29                                                                  | Diabetes mellitus                                                                                                  | E10-E14                                                                                                        | 3778 37%   | 3546 40%  | 17282 40%  |
| 30                                                                  | Malnutrition and other nutritional deficiencies                                                                    | E40-E64                                                                                                        | 116 1%     | 22 0%     | 179 0%     |
| 31                                                                  | <b>Obesity</b>                                                                                                     | E66                                                                                                            | 10233 100% | 8882 100% | 42728 100% |
| 32                                                                  | Disorders of thyroid gland                                                                                         | E00-E07                                                                                                        | 196 2%     | 286 3%    | 711 2%     |
| 33                                                                  | Other endocrine, nutritional and metabolic diseases                                                                | (E00-E90) except Supra 'E' codes                                                                               | 1112 11%   | 903 10%   | 5179 12%   |
| <b>Mental and behavioural disorders</b>                             |                                                                                                                    |                                                                                                                |            |           |            |
| 34                                                                  | Alcoholic psychosis/chronic alcohol abuse                                                                          | F10.1 to F10.9, G31.2                                                                                          | 413 4%     | 50 1%     | 907 2%     |
| 35                                                                  | Drug dependence, toxicomania                                                                                       | F11-F16 except F11.0, F12.0,F13.0, F14.0, F15.0, F16.0 F18-F19 except F18.0, F19.0                             | 5 0%       | 5 0%      | 466 1%     |
| 36                                                                  | Dementias (excluding Alzheimer)                                                                                    | F01, F03, G31.0, G31.1, G31.8, G31.9                                                                           | 137 1%     | 123 1%    | 579 1%     |
| 37                                                                  | Other mental and behavioural disorders                                                                             | (F00-F99) except F10.0, F11.0, F12.0, F13.0, F14.0, F15.0, F16.0, F17.0, F18.0, F19.0 and Supra 'F' codes      | 1045 10%   | 475 5%    | 7345 17%   |
| <b>Diseases of the nervous system</b>                               |                                                                                                                    |                                                                                                                |            |           |            |
| 38                                                                  | Epilepsia                                                                                                          | G40-G41                                                                                                        | 95 1%      | 77 1%     | 49 0%      |
| 39                                                                  | Alzheimer's disease                                                                                                | G30                                                                                                            | 85 1%      | 36 0%     | 159 0%     |
| 40                                                                  | Parkinson's disease                                                                                                | G20, G21                                                                                                       | 52 1%      | 72 1%     | 109 0%     |
| 41                                                                  | Other diseases of the nervous system                                                                               | (G00-G98) except G31.0, G31.1, G31.2, G31.8, G31.9 and Supra 'G' codes                                         | 1244 12%   | 500 6%    | 6124 14%   |
| <b>Diseases of the circulatory system</b>                           |                                                                                                                    |                                                                                                                |            |           |            |
| 42                                                                  | Ischemic heart diseases                                                                                            | I20-I25                                                                                                        | 2387 23%   | 2746 31%  | 16020 37%  |
| 43                                                                  | Other heart diseases                                                                                               | I00-I09, I30-I33, I39-I45, I47-I48, I49 except I49.0 and I50-I52                                               | 3633 36%   | 3836 43%  | 13144 31%  |
| 44                                                                  | Cerebrovascular diseases                                                                                           | I60-I69                                                                                                        | 903 9%     | 1158 13%  | 1842 4%    |
| 45                                                                  | Hypertensive diseases                                                                                              | I10-I15                                                                                                        | 3973 39%   | 4226 48%  | 18942 44%  |
| 46                                                                  | Other diseases of the circulatory system                                                                           | (I00-I99) except I46, I49.0, I95.9, I99 and Supra 'I' codes                                                    | 2026 20%   | 1519 17%  | 6425 15%   |
| <b>Diseases of the respiratory system</b>                           |                                                                                                                    |                                                                                                                |            |           |            |
| 47                                                                  | Influenza                                                                                                          | J10-J11                                                                                                        | 15 0%      | 10 0%     | 21 0%      |
| 48                                                                  | Pneumonia                                                                                                          | J12-J18                                                                                                        | 785 8%     | 541 6%    | 2518 6%    |
| 49                                                                  | Other acute lower respiratory diseases                                                                             | J00-J09, J19-J22                                                                                               | 134 1%     | 47 1%     | 66 0%      |
| 50                                                                  | Asthma                                                                                                             | J45-J46                                                                                                        | 162 2%     | 72 1%     | 924 2%     |
| 51                                                                  | Other chronic lower respiratory diseases                                                                           | J40-J44                                                                                                        | 1152 11%   | 2209 25%  | 7837 18%   |
| 52                                                                  | Lung diseases due to external agents                                                                               | J60-J70                                                                                                        | 143 1%     | 56 1%     | 465 1%     |
| 53                                                                  | Other diseases of the respiratory system                                                                           | (J00-J99) except J96.0, J96.9 and Supra 'J' codes                                                              | 1401 14%   | 1317 15%  | 2615 6%    |
| <b>Diseases of the digestive system</b>                             |                                                                                                                    |                                                                                                                |            |           |            |
| 54                                                                  | Ulcer of stomach, duodenum and jejunum                                                                             | K25-K28                                                                                                        | 62 1%      | 54 1%     | 127 0%     |
| 55                                                                  | Chronic liver disease                                                                                              | K70, K73-K74                                                                                                   | 333 3%     | 183 2%    | 892 2%     |
| 56                                                                  | Other diseases of the digestive system                                                                             | (K00-K93) except Supra 'K' codes                                                                               | 1094 11%   | 969 11%   | 2941 7%    |
| 57                                                                  | <b>Diseases of the skin and subcutaneous tissue</b>                                                                | L00-L99                                                                                                        | 328 3%     | 263 3%    | 1153 3%    |
| <b>Diseases of the musculoskeletal system/connective tissue</b>     |                                                                                                                    |                                                                                                                |            |           |            |
| 58                                                                  | Rheumatoid arthritis and osteoarthritis                                                                            | M05-M06, M15-M19                                                                                               | 98 1%      | 237 3%    | 700 2%     |
| 59                                                                  | Other diseases of the musculoskeletal system/connective tissue                                                     | (M00-M99) except Supra 'M' codes                                                                               | 293 3%     | 207 2%    | 1196 3%    |
| <b>Diseases of the genitourinary system</b>                         |                                                                                                                    |                                                                                                                |            |           |            |
| 60                                                                  | Renal Failure                                                                                                      | N17-N19                                                                                                        | 1335 13%   | 1961 22%  | 5316 12%   |
| 61                                                                  | Other diseases of kidney and ureter                                                                                | N00-N16                                                                                                        | 87 1%      | 23 0%     | 637 1%     |
| 62                                                                  | Hyperplasia of prostate                                                                                            | N40                                                                                                            | 12 0%      | 39 0%     | 73 0%      |
| 63                                                                  | Other diseases of the genitourinary system                                                                         | (N00-N99) except Supra 'N' codes                                                                               | 183 2%     | 182 2%    | 1090 3%    |
| 64                                                                  | <b>Other diseases</b>                                                                                              | O00-O99, (P00-P96) except P28.5, Q00-Q99, H00- H59, H60- H95, R95                                              | 68 1%      | 83 1%     | 185 0%     |
| <b>Other Symptoms, signs, abnormal findings, ill-defined causes</b> |                                                                                                                    |                                                                                                                |            |           |            |
| 65                                                                  | Senility                                                                                                           | R54                                                                                                            | 0 0%       | 68 1%     | 0 0%       |
| 66                                                                  | Mechanisms of the death °                                                                                          | I46, I49.0, R09.2, R40.2, R57 (R00-R94), (R96-R99), I95.9, I99,                                                | 0 0%       | 0 0%      | 70 0%      |
| 67                                                                  | Other symptoms, signs, abnormal findings, ill-defined causes°°                                                     | J96.0, J96.9, P28.5, U00 except Supra "R" codes                                                                | 0 0%       | 0 0%      | 6 0%       |
| <b>External causes</b>                                              |                                                                                                                    |                                                                                                                |            |           |            |
| 68                                                                  | Transport accidents                                                                                                | V01-V99, Y85                                                                                                   | 35 0%      | 17 0%     | 245 1%     |
| 69                                                                  | Accidental falls                                                                                                   | W00-W19                                                                                                        | 117 1%     | 45 1%     | 456 1%     |
| 70                                                                  | Accidental poisoning                                                                                               | X40-X49                                                                                                        | 66 1%      | 5 0%      | 837 2%     |
| 71                                                                  | Suicide/intentional self-harm                                                                                      | X60-X84                                                                                                        | 41 0%      | 2 0%      | 76 0%      |
| 72                                                                  | Other external causes                                                                                              | S, T, V, W, X Y codes except Supra codes, F10.0, F11.0, F12.0, F13.0, F14.0, F15.0, F16.0, F17.0, F18.0, F19.0 | 1005 10%   | 535 6%    | 3314 8%    |

UC: Underlying cause CC: Contributing cause

°) Cardiac arrest (I46), Ventricular fibrillation (I49.0), Respiratory arrest (R09.2), Coma (R40.2), Shock (R57)

°°) Hypotension (I95.9), Other unspecified disorders of circulatory system (I99), Acute respiratory failure (J96.0), Respiratory failure unspecified (J96.9), Respiratory failure of newborn (P28.5)

**Table S2. Clusters resulting from the Multiple Correspondence Analyses: pooled analysis and country-specific analyses. Deaths at ages 50-89 years with any mention of obesity. France, Italy and the United States, 2010-2011**

| Pooled analysis           | France                                                                                                                                                         | Italy                                                                                                                                           | U.S.                                                                                                                                                           |
|---------------------------|----------------------------------------------------------------------------------------------------------------------------------------------------------------|-------------------------------------------------------------------------------------------------------------------------------------------------|----------------------------------------------------------------------------------------------------------------------------------------------------------------|
| Cluster 1/9 (16%)         | <b>Obesity UC 75%</b> Other respiratory diseases 32%<br>(17%)                                                                                                  | <b>Obesity UC 98%</b><br>(12%)                                                                                                                  | <b>Obesity UC 92%</b> Other nervous diseases 27%<br>(13%)                                                                                                      |
| Cluster 2/9 (24%)         | <b>Obesity CC 90% Other endocrine or metabolic diseases 94% Hypertension 70%</b> Diabetes 48% Ischemic heart diseases 47%<br>(8%)                              | <b>Obesity CC 98% Ischemic heart diseases 65% Hypertension 64% Diabetes 56%</b> Other endocrine or metabolic diseases 24%<br>(21%)              | <b>Obesity CC 97% Hypertension 83% Ischemic heart diseases 77%</b> Diabetes 70% Other endocrine or metabolic diseases 33%<br>(19%)                             |
| Cluster 3/9 (18%)         | <b>Obesity CC 98% Other heart diseases 53% Diabetes 53%</b> Hypertension 46% Ischemic heart diseases 39% Other diseases of the circulatory system 25%<br>(29%) | <b>Obesity CC 98% Other heart diseases 75%</b> Chronic lower respiratory diseases 48% Renal failure 32% Other respiratory diseases 25%<br>(25%) | <b>Obesity CC 96% Other heart diseases 75% Diabetes 68%</b> Other diseases of the circulatory system 39% Renal failure 39%<br>(12%)                            |
| Cluster 4/9 (8%)          | <b>Obesity CC 92% Cerebrovascular diseases 86% Hypertension 62%</b> Diabetes 45% Other nervous diseases 32%<br>(9%)                                            | <b>Obesity CC 92% Cerebrovascular diseases 77% Hypertension 67%</b> Other nervous diseases 36%<br>(11%)                                         | <b>Obesity CC 89% Cerebrovascular diseases 100% Hypertension 60%</b> Diabetes 49%<br>(4%)                                                                      |
| Cluster 5/9 (12%)         | <b>Obesity CC 82% Skin diseases 57%</b> Other infectious diseases 48% Septicemia 41% Renal failure 21%<br>(5%)                                                 | <b>Obesity CC 96% Pneumonia 49% Septicemia 59%</b> Diabetes 45% Renal failure 37% Chronic lower respiratory diseases 36%<br>(10%)               | <b>Obesity CC 85% Septicemia 69%</b> Diabetes 43% Skin diseases 36% Renal failure 32% Other genitourinary diseases 26% Other digestive diseases 23%<br>(7%)    |
|                           |                                                                                                                                                                |                                                                                                                                                 | <b>Obesity CC 79% Pneumonia 60% Other respiratory diseases 52%</b> Chronic lower respiratory diseases 28% Other nervous diseases 24% Renal failure 21%<br>(8%) |
| Cluster 6/9 (9%)          | <b>Obesity CC 79% Mental disorders 84%</b> Alcoholic psychosis-chronic alcohol abuse 31% Chronic lower respiratory diseases 22%<br>(9%)                        | <b>Obesity CC 95% Mental disorders 58%</b> Disorders of thyroid gland 46%<br>(6%)                                                               | <b>Obesity CC 91% Chronic lower respiratory diseases 68%</b> Ischemic heart diseases 45% Mental disorders 17%<br>(15%)                                         |
| Cluster 7/9 (8%)          | <b>Obesity CC 94% External causes 80%</b> Other diseases of the circulatory system 36% Other digestive diseases 27%<br>(9%)                                    | -                                                                                                                                               | <b>Obesity CC 97% External causes 30%</b><br>(18%)                                                                                                             |
| Cluster 8/9 (3%)          | <b>Obesity CC 91% Chronic liver disease 88% Other digestive diseases 54%</b> Alcoholic psychosis-chronic alcohol abuse 31% Septicaemia 20%<br>(4%)             | <b>Obesity CC 94% Other digestive diseases 85%</b> Renal failure 33% Chronic liver disease 27% Septicaemia 27%<br>(8%)                          | <b>Obesity CC 87% Chronic liver disease 92%</b> Other digestive diseases 48% Alcoholic psychosis-chronic alcohol abuse 21%<br>(2%)                             |
| Cluster 9/9 (2%)          | <b>Obesity CC 98%</b> Septicaemia 38% Pneumonia 35% Secondary neoplasm 30% Other digestive diseases 26% Other respiratory diseases 22%<br>(11%)                | <b>Obesity CC 99% Secondary neoplasm 100%</b><br>(3%)                                                                                           | -                                                                                                                                                              |
| Country-specific clusters | -                                                                                                                                                              | -                                                                                                                                               | <b>Obesity CC 82% Asthma 100%</b> Hypertension 52% Other nervous diseases 23%<br>(2%)                                                                          |
|                           | -                                                                                                                                                              | <b>Obesity CC 87% Rheumatoid arthritis and osteoarthritis 55%</b> Other musculoskeletal diseases 48%<br>(5%)                                    | -                                                                                                                                                              |

UC: Underlying cause CC: Contributing cause

Reading note: 17% of all deaths at ages 50-89 years with any mention of obesity in France are included in the first cluster. For 75% of those deaths obesity is the underlying cause. Groups of causes that are mentioned on more than 50% of the death certificates of a cluster are in bold. Note that the percentages in a cluster add up to more than 100 because several groups of causes can be simultaneously listed on a death certificate.
